# Supplementary material for: Per2 deficiency in microglia alleviates motor dysfunction by inhibiting ferroptosis in spinal cord injury
Source: Research Square preprint supplement (doi:10.21203/rs.3.rs-5993581/v1), 2025-02-13
Supplement: Supplementary file 1 [file 963eda1613e80c25eea2e96a.docx]

**Per2 deficiency in microglia alleviates motor dysfunction by inhibiting ferroptosis in spinal cord injury**

**Pengfei Bie****a,d, Dongpo Sua, Yang Gaoa,d, Liang Wuc, Zhanfeng Niuc, Yanbin Zhaoa,d, He Hea, Zhanfeng Jianga, Zhong Zenge, Yaolin Zhangb, Heng Fanb,*, and Hechun Xiab,c,***

a The first school of clinical medicine, Ningxia Medical University, Yinchuan 750004, Ningxia Hui Autonomous Region, People’s Republic of China.

b Ningxia Key Laboratory of Stem Cell and Regenerative Medicine, Institute of Medical Sciences, General Hospital of Ningxia Medical University, Yinchuan 750004, Ningxia Hui Autonomous Region, People’s Republic of China.

c Department of Neurosurgery, General Hospital of Ningxia Medical University, Yinchuan 750004, Ningxia Hui Autonomous Region, People’s Republic of China.

d Department of Neurosurgery, People’s Hospital of Ningxia Hui Autonomous Region (the third school of clinical medicine, Ningxia Medical University), Yinchuan 750002, Ningxia Hui Autonomous Region, People’s Republic of China.

e Department of Orthopaedics, The Affiliated Hospital of Yangzhou University, Yangzhou 225000, Jiangsu, People’s Republic of China.

*Corresponding authors: Email: [fangheng@nxmu.edu.cn](mailto:fangheng@nxmu.edu.cn); [xhechun@nyfy.com.cn](mailto:xhechun@nyfy.com.cn).


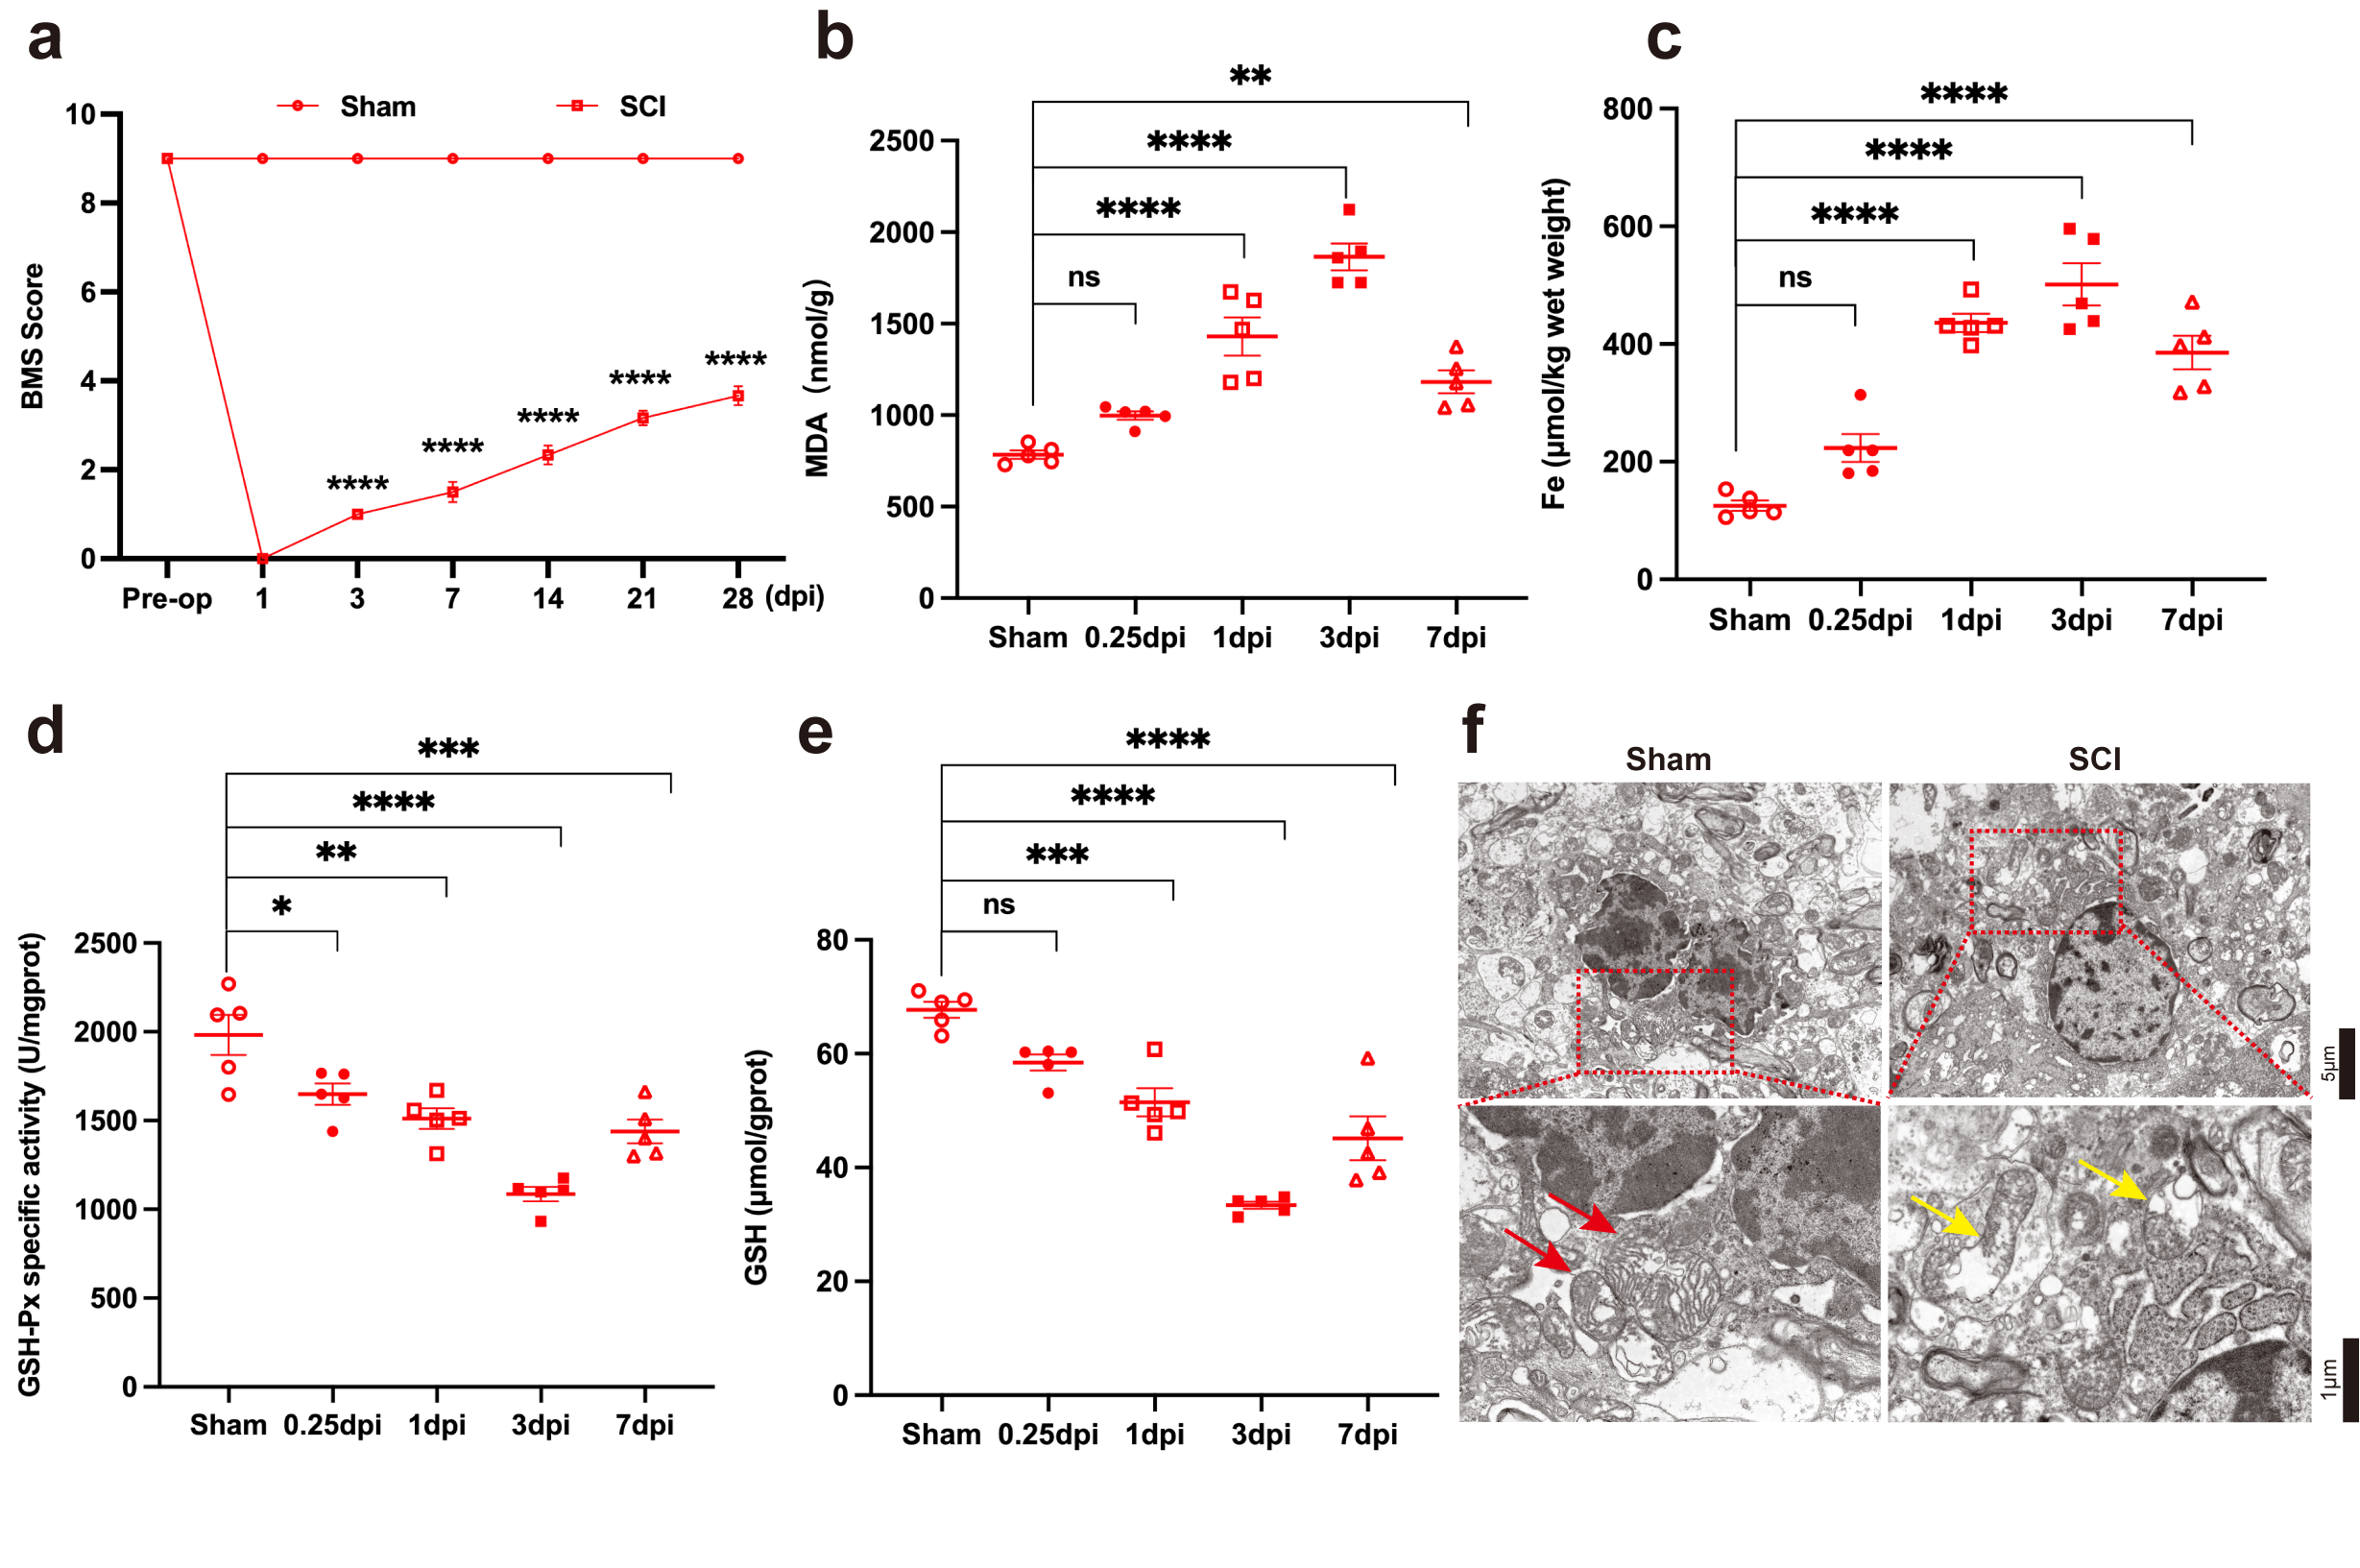
**SUPPLEMENTARY FIGURES**

**Supplementary Figure 1 Microglia undergo ferroptosis after SCI.** **a** BMS scores during 28 days of recovery after SCI in sham and SCI mice (n = 6 animals per group). **b-e** The levels of MDA, Fe, GSH-Px, and GSH were detected by corresponding assay kits (n = 5 animals per group). **f** Representative TEM images of the microglia of sham and SCI mice. Red arrow: healthy mitochondria. Yellow arrow: damaged mitochondria. Scale bars, 5 μm or 1 μm. All data are presented as the mean ± SEM. *P* values were determined by two-way ANOVA with Tukey’s test for multiple comparisons (**a**), and one-way ANOVA with Tukey’s multiple-comparisons test (**b, c, d,** and **e**). **P*<0.05; ***P*<0.01; ****P*<0.001; *****P*<0.0001; ns, not significant.

**
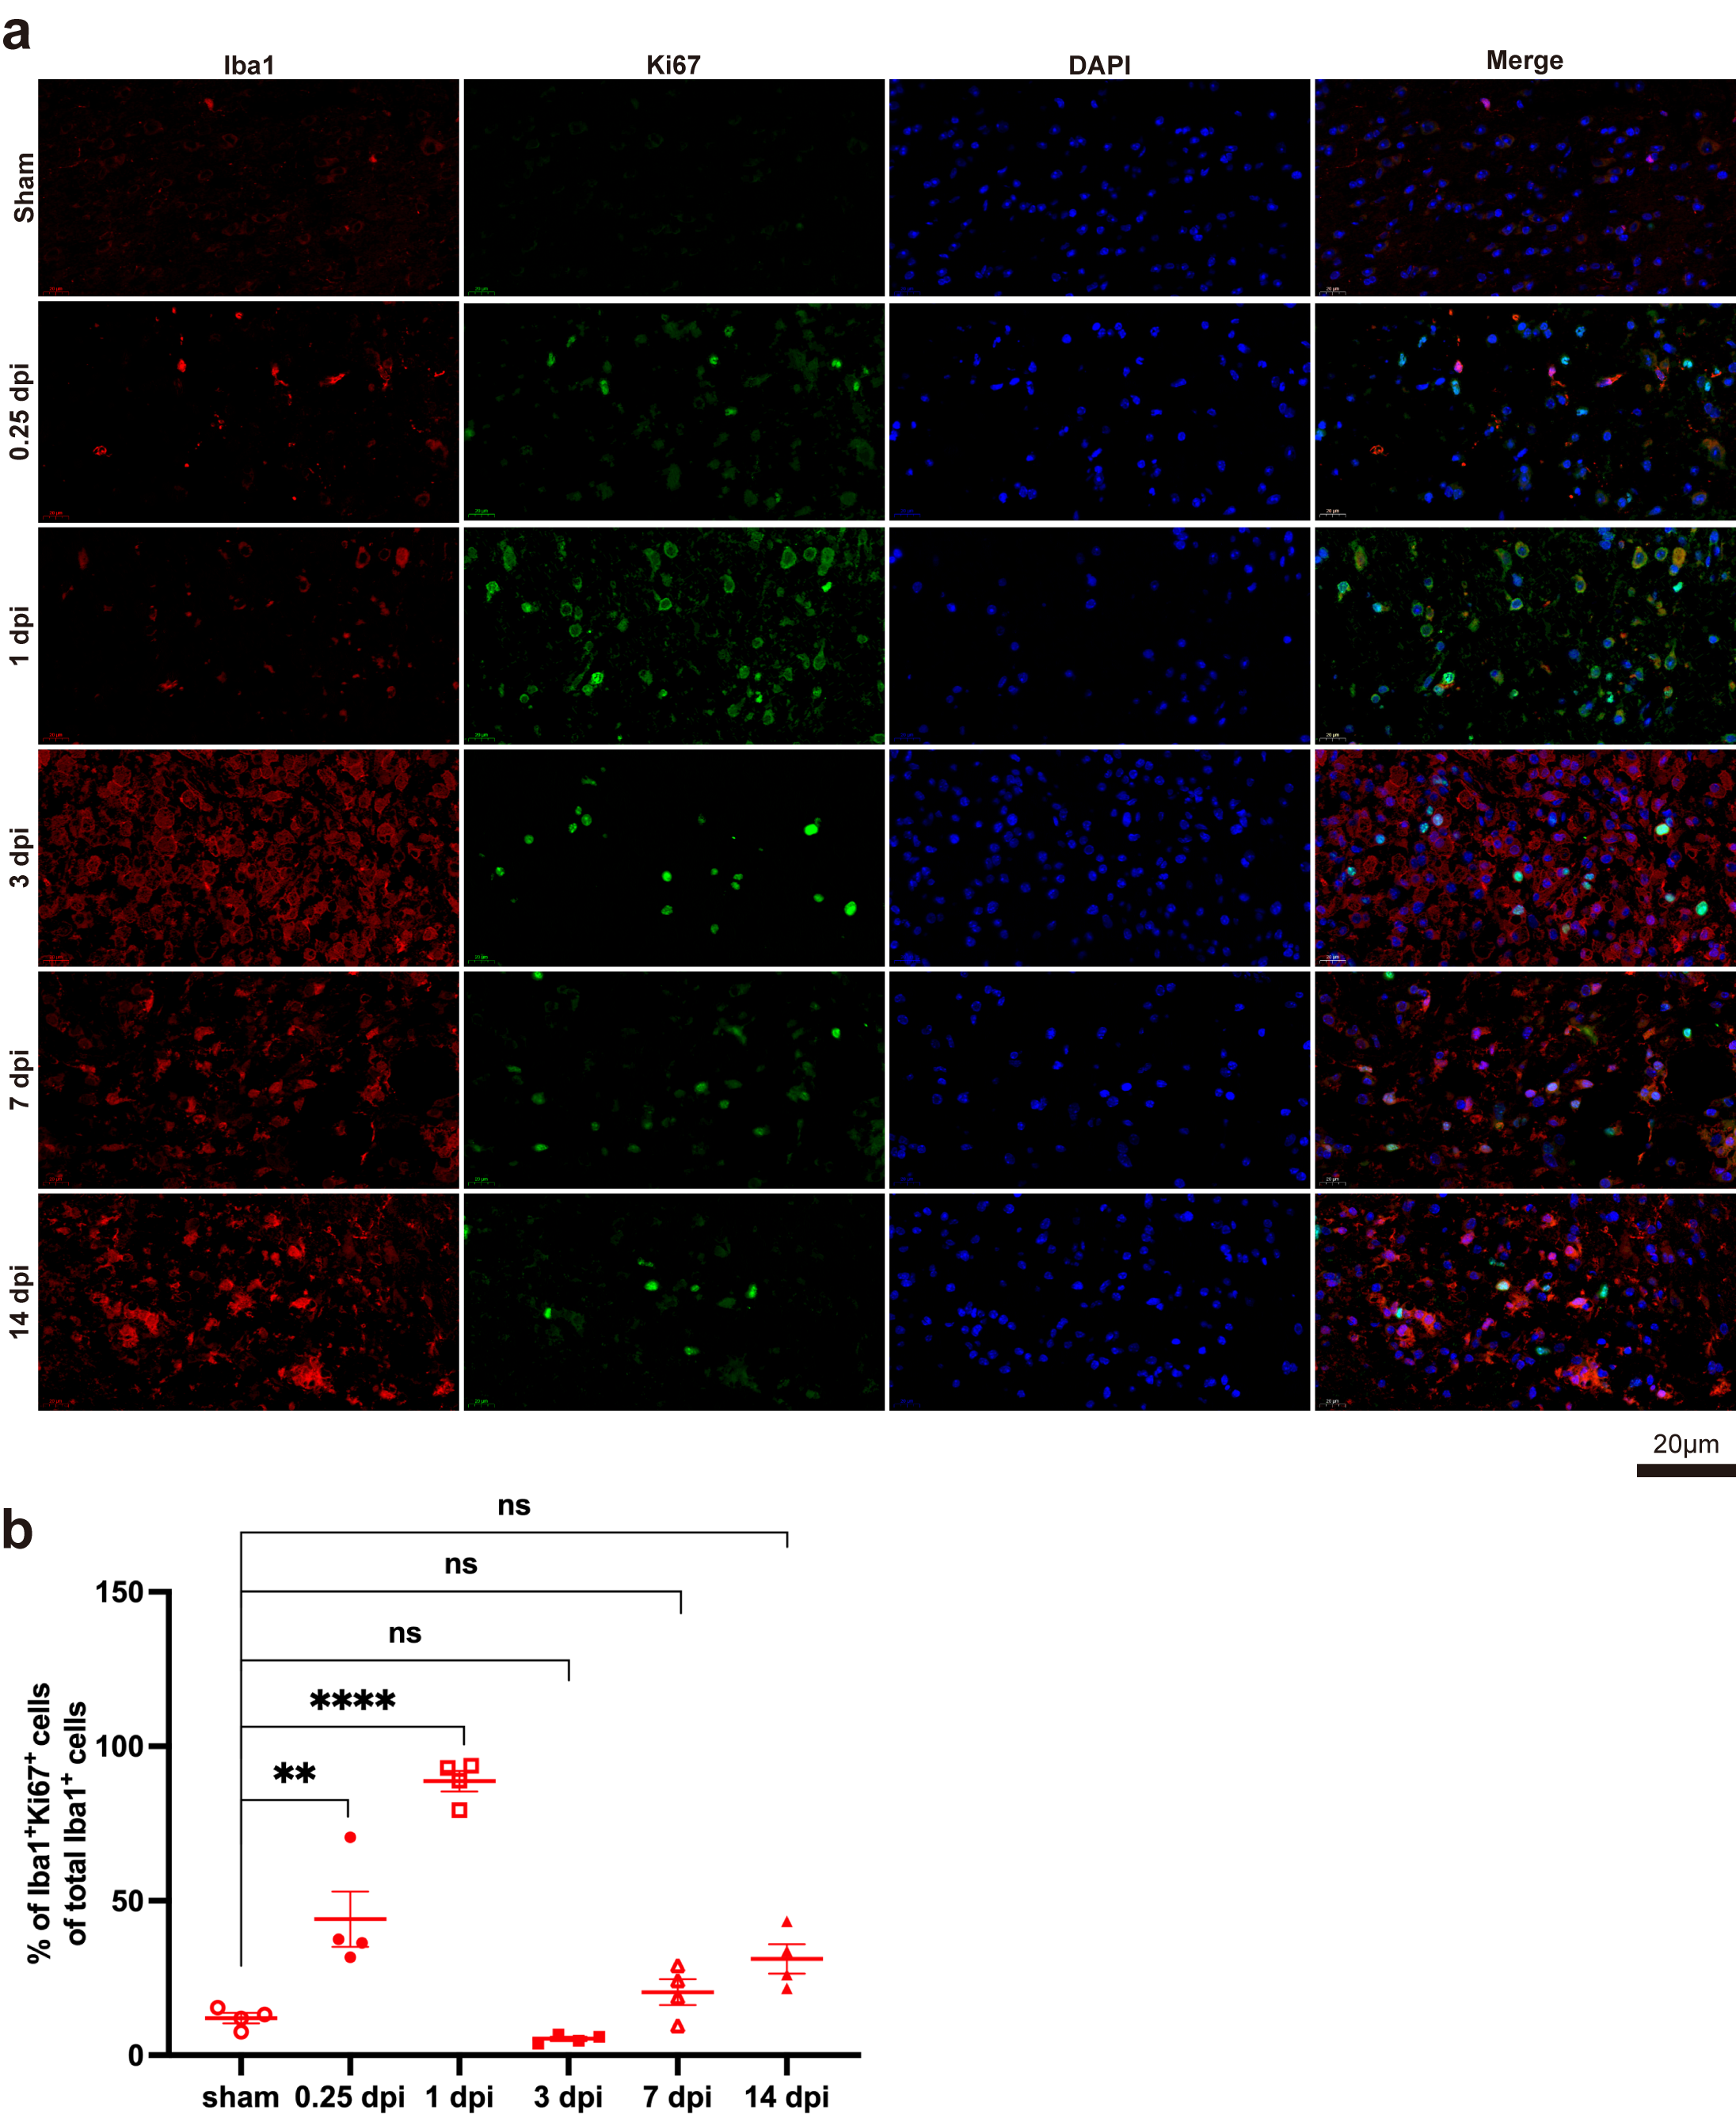
**

**Supplementary Figure 2 Microglia proliferate at the lesion epicenter after SCI.** **a** Immunofluorescence images showing expression of proliferate marker Ki67 at 0.25, 1, 3, 7, and 14 dpi, as well as in uninjured mice. Scale bars, 20 μm. **b** Quantification of the percentage of proliferating microglia (Iba1+Ki67+ cells) at 0.25, 1, 3, 7, and 14 dpi, as well as in uninjured mice (n = 4 animals per group). All data are presented as the mean ± SEM. *P* values were determined by one-way ANOVA with Tukey’s multiple-comparisons test (**b**). ***P*<0.01; *****P*<0.0001; ns, not significant.


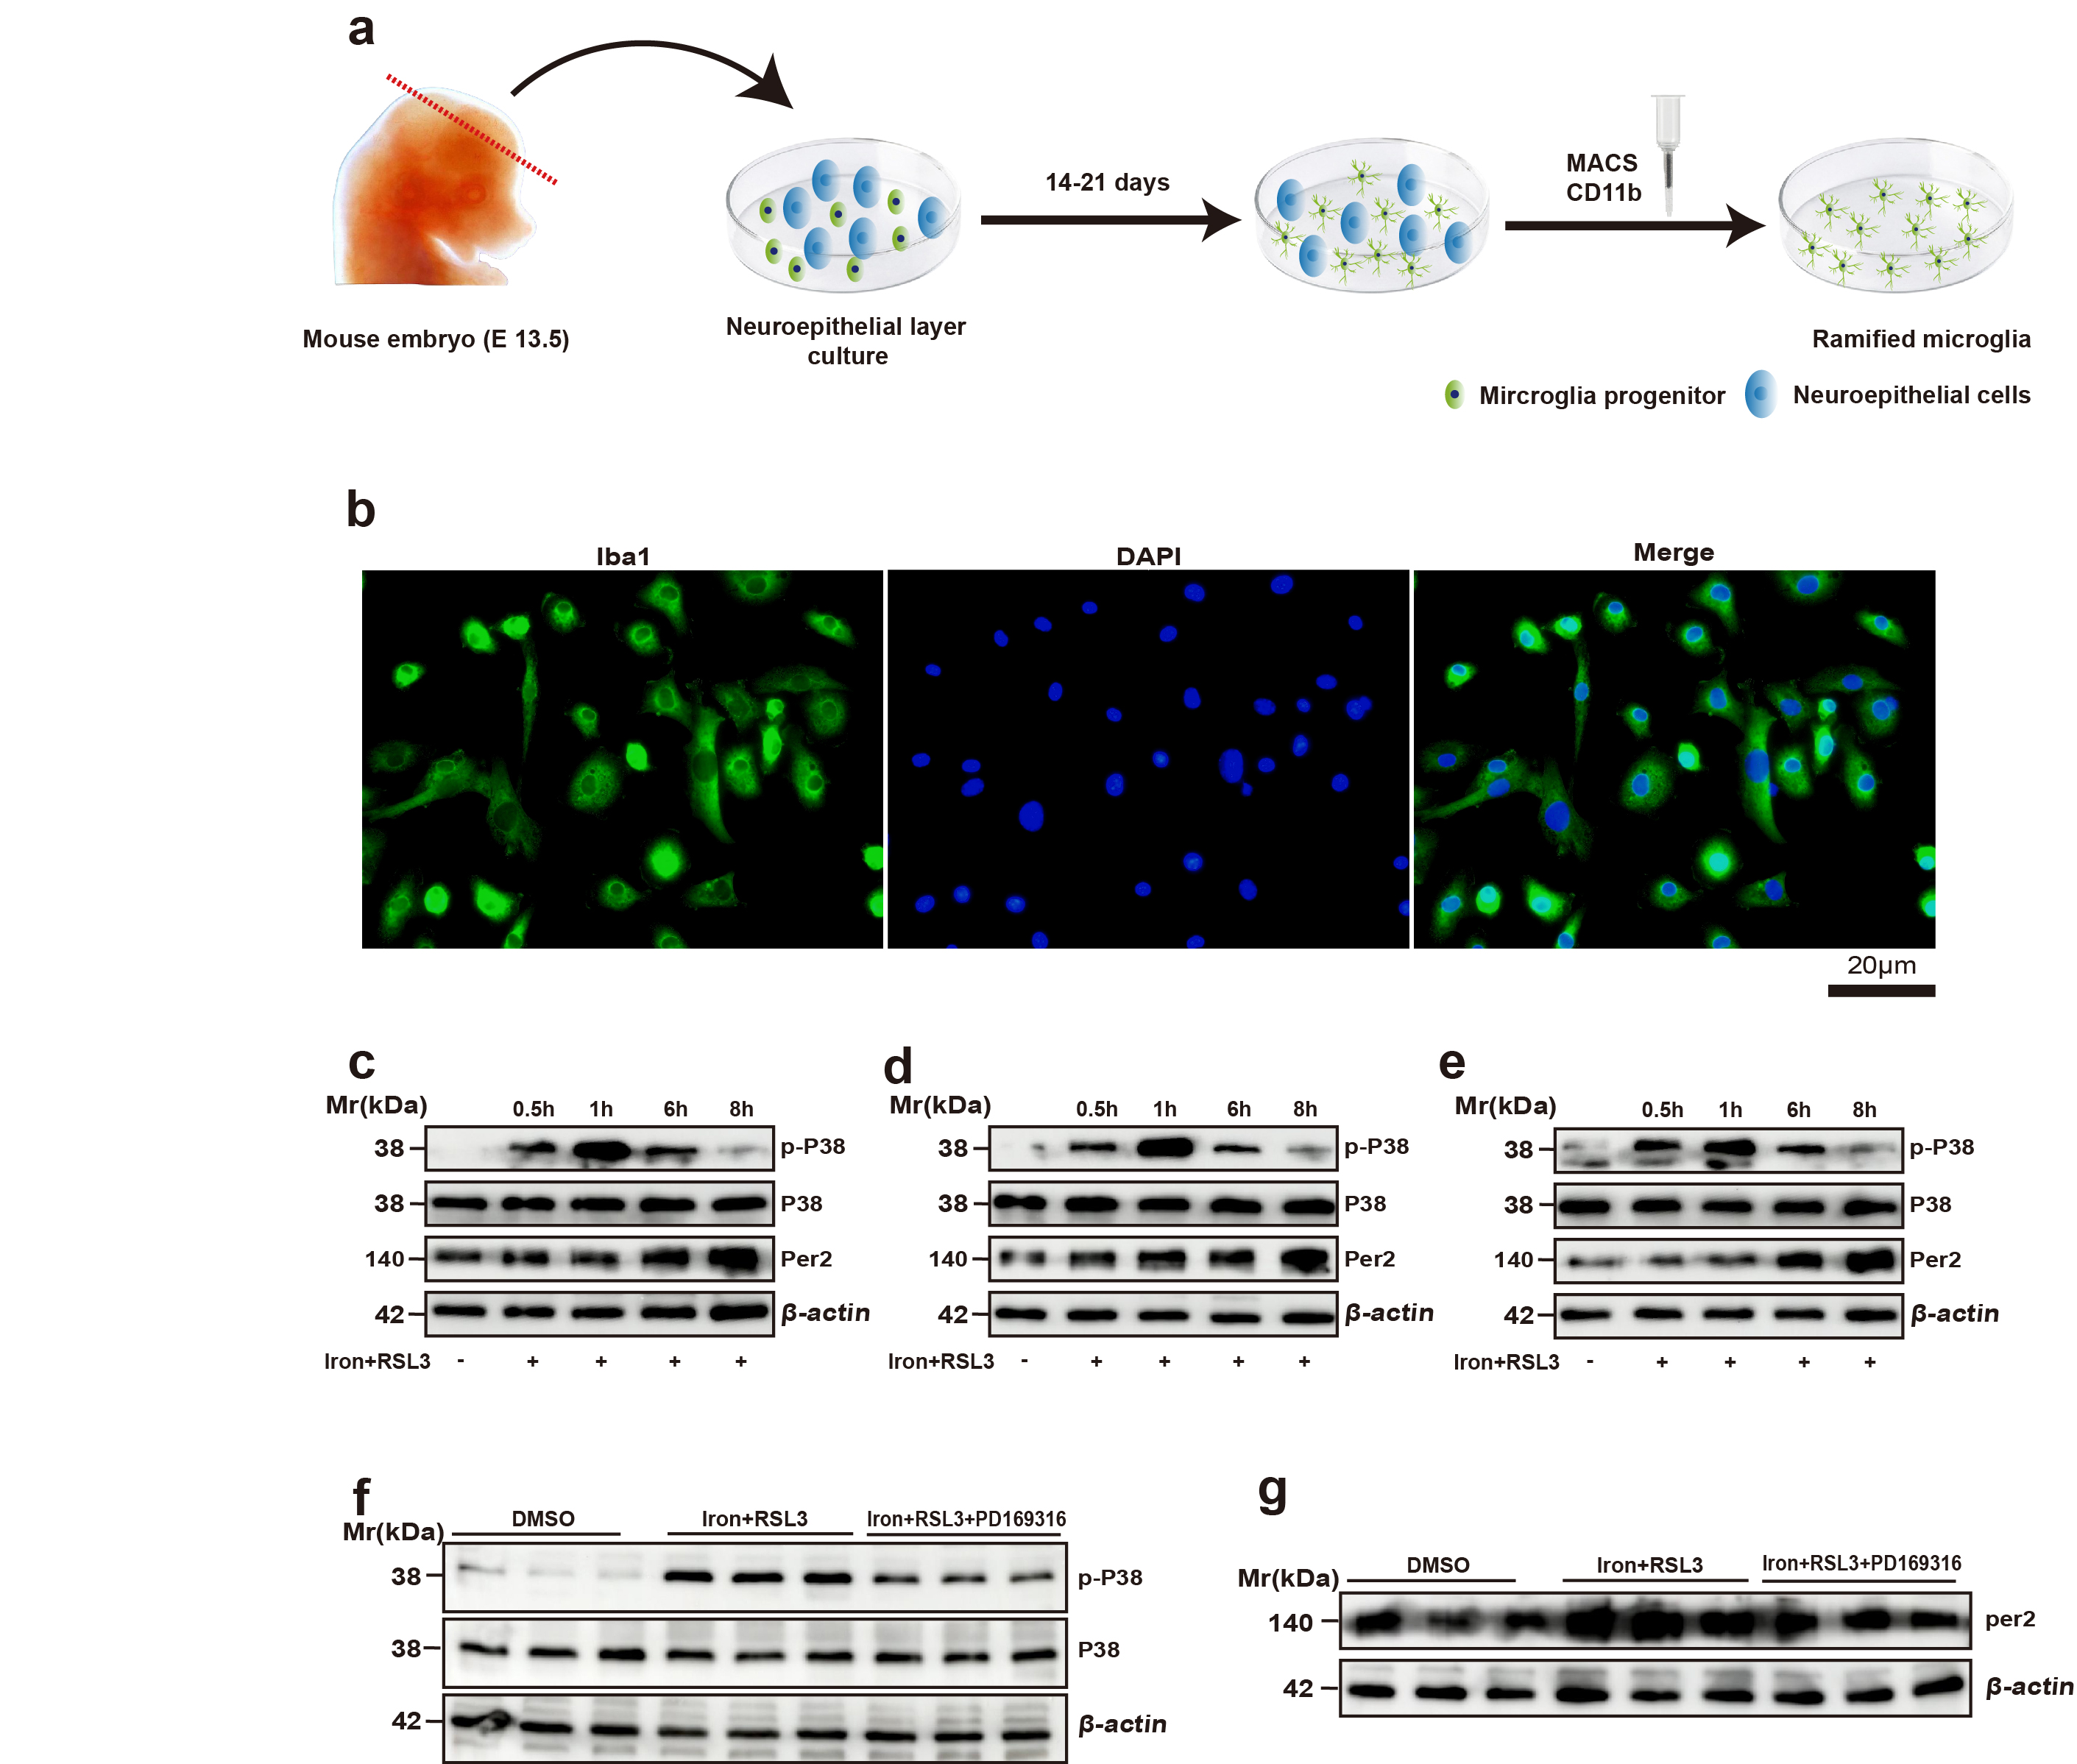


**Supplementary Figure 3 A method to obtain bankable and expandable adult-like microglia and the repeated immunoblots.** **a** Mouse head neuroepithelial layer (NEL) was dissected at E13.5 and was cultured for 14-21 days, then CD11b+ cells were isolated from cultured NEL using a MACS system. **b** Iba1 was conducted to verify the primary microglia. Scale bars, 20 μm. **c-e** Repeated immunoblots of Fig. 2d. **f** Repeated immunoblots of Fig. 2g. **g** Repeated immunoblots of Fig. 2i.

**Supplementary Figure 4**

**Per2global knockout benefits motor function recovery via inhibiting microglial ferroptosis.** **a** qRT-PCR analysis of Per2 mRNA levels in microglia from WT and global Per2GKO mice (n = 4 biological repeats for each group). **b** Immunofluorescence image showing expression of proliferate marker Ki67 in WT and Per2GKO mice at 3dpi. Scale bars, 20 μm. **c** Quantification of the percentage of proliferating microglia (Iba1+Ki67+ cells) in WT and Per2KO mice at 3dpi (n = 4-5 animals per group). **d** BMS scores during 28 days of recovery after SCI in Per2GKO and WT mice. (n=6 animals per group). **e** Representative TEM images of the microglia of WT and Per2GKO mice. Red arrow: damaged mitochondria. Yellow arrow: relatively mild damaged mitochondria. Scale bars, 5 μm or 1 μm. **f** Representative Immunofluorescence images of Iba1 and Acsl4, showing lower Acsl4 expression in microglia of the spinal cord in Per2GKO mice at 3 dpi than in WT mice. Scale bars, 100 μm or 20 μm. **g** Quantification of the relative fluorescence intensity of Acsl4 (n = 4 animals per group). **h** Nissl staining to observe the number of neurons in spinal cord tissues of the different groups, Arrows indicate neurons containing Nissl bodies. Scale bars, 100 μm or 20 μm. **i** Quantification of the Nissl bodies (n = 4 animals per group). **j** Representative immunofluorescence images of NeuN in spinal cord tissues of the different groups. Scale bars, 200 μm. **k** Quantification of the number of NeuN+ neurons (n = 5 animals per group). **l** The levels of IGF-1 in the serum of mice (n = 4 animals per group) were detected by Elisa kits. All data are presented as the mean ± SEM. *P* values were determined by two-tailed unpaired Student’s t-test (**a, c, g, i,** and **k**), one-way ANOVA with Tukey’s multiple-comparisons test (**l**), and two-way ANOVA with Tukey’s test for multiple comparisons (**d)**, **P*<0.05; ***P*<0.01; ****P*<0.001; *****P*<0.0001; ns, not significant.


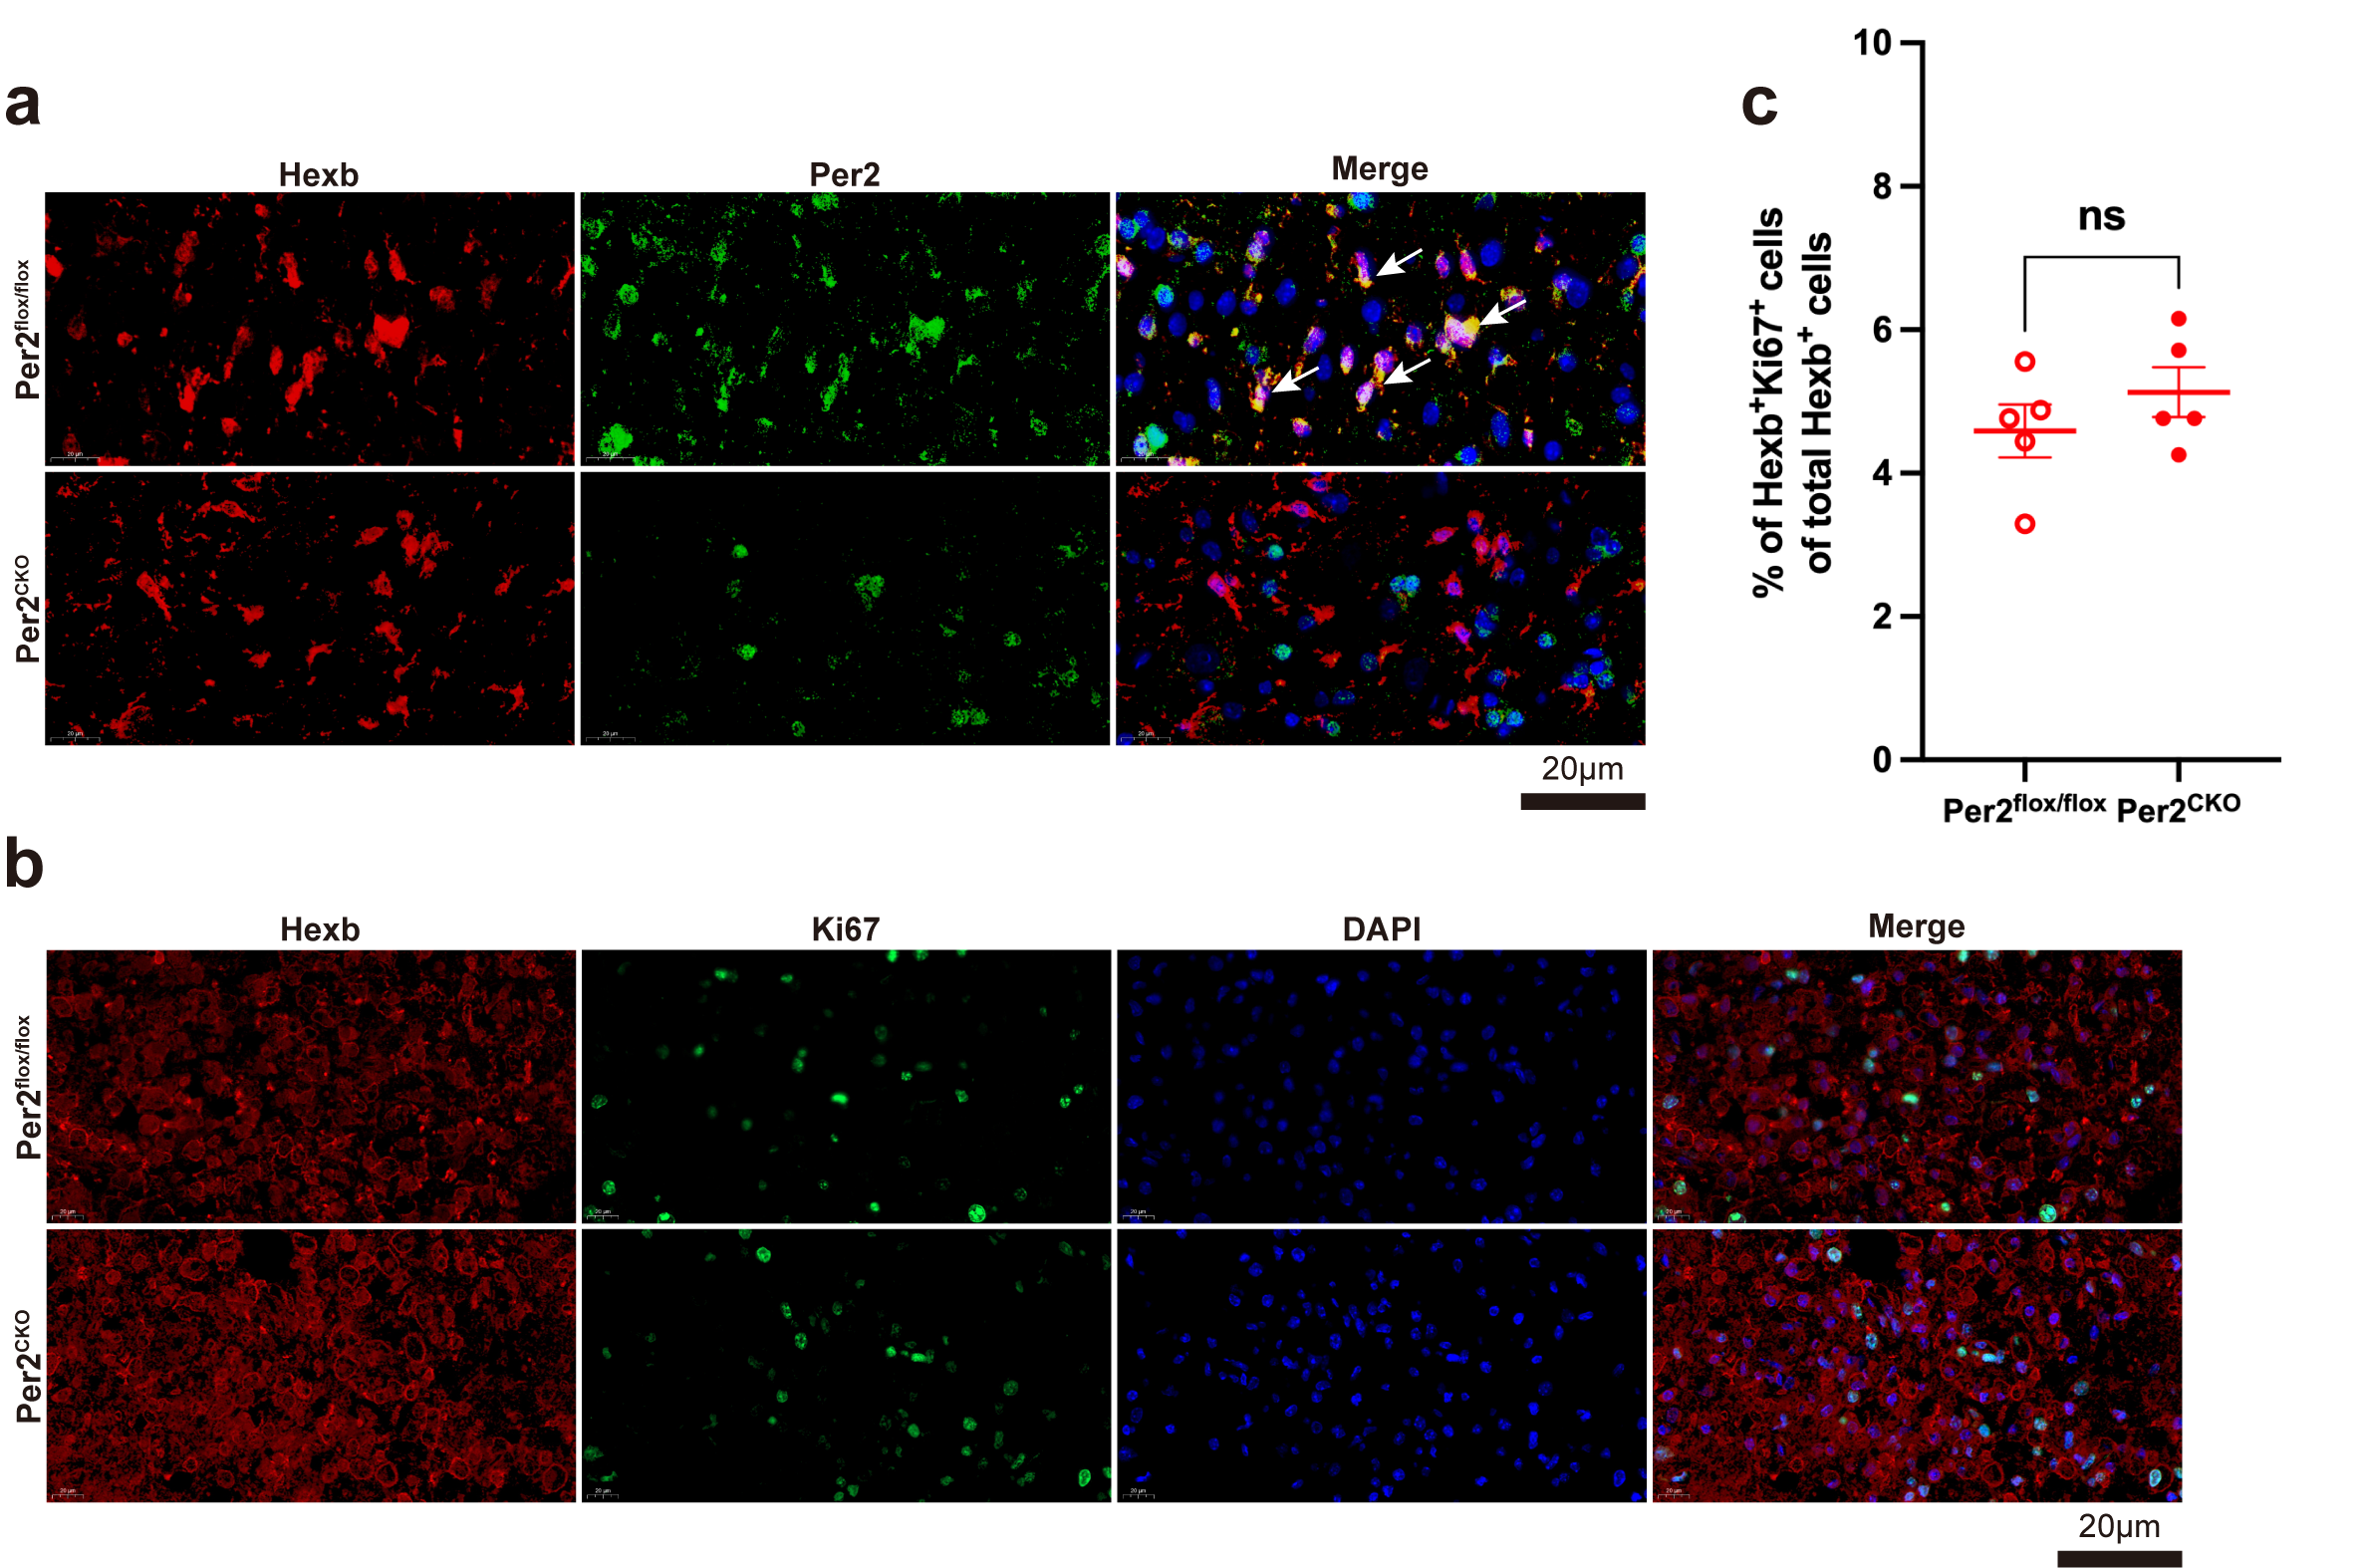


**Supplementary Figure 5 Microglia-specific Per2 knockout mice.** Given the circadian rhythm of Per2 levels, all specimens were collected between 2-4 PM. **a** Immunofluorescence images of Hexb (red) and Per2 (green) in the spinal cord in Per2flox/flox and Per2CKO mice, indicating Per2 knockout in the microglia of the spinal cord in Per2CKO mice (white arrows indicate microglial Per2 expression). Scale bars, 20 μm. **b** Immunofluorescence image showing expression of proliferate marker Ki67 in Per2flox/flox and Per2CKO mice at 3dpi. Scale bars, 20 μm. **c** Quantification of the percentage of proliferating microglia (Hexb+Ki67+ cells) in Per2flox/flox and Per2CKO mice at 3dpi (n = 5 animals per group). All data are presented as the mean ± SEM. *P* values were determined by two-tailed unpaired Student’s t-test (**c**). ns, not significant.


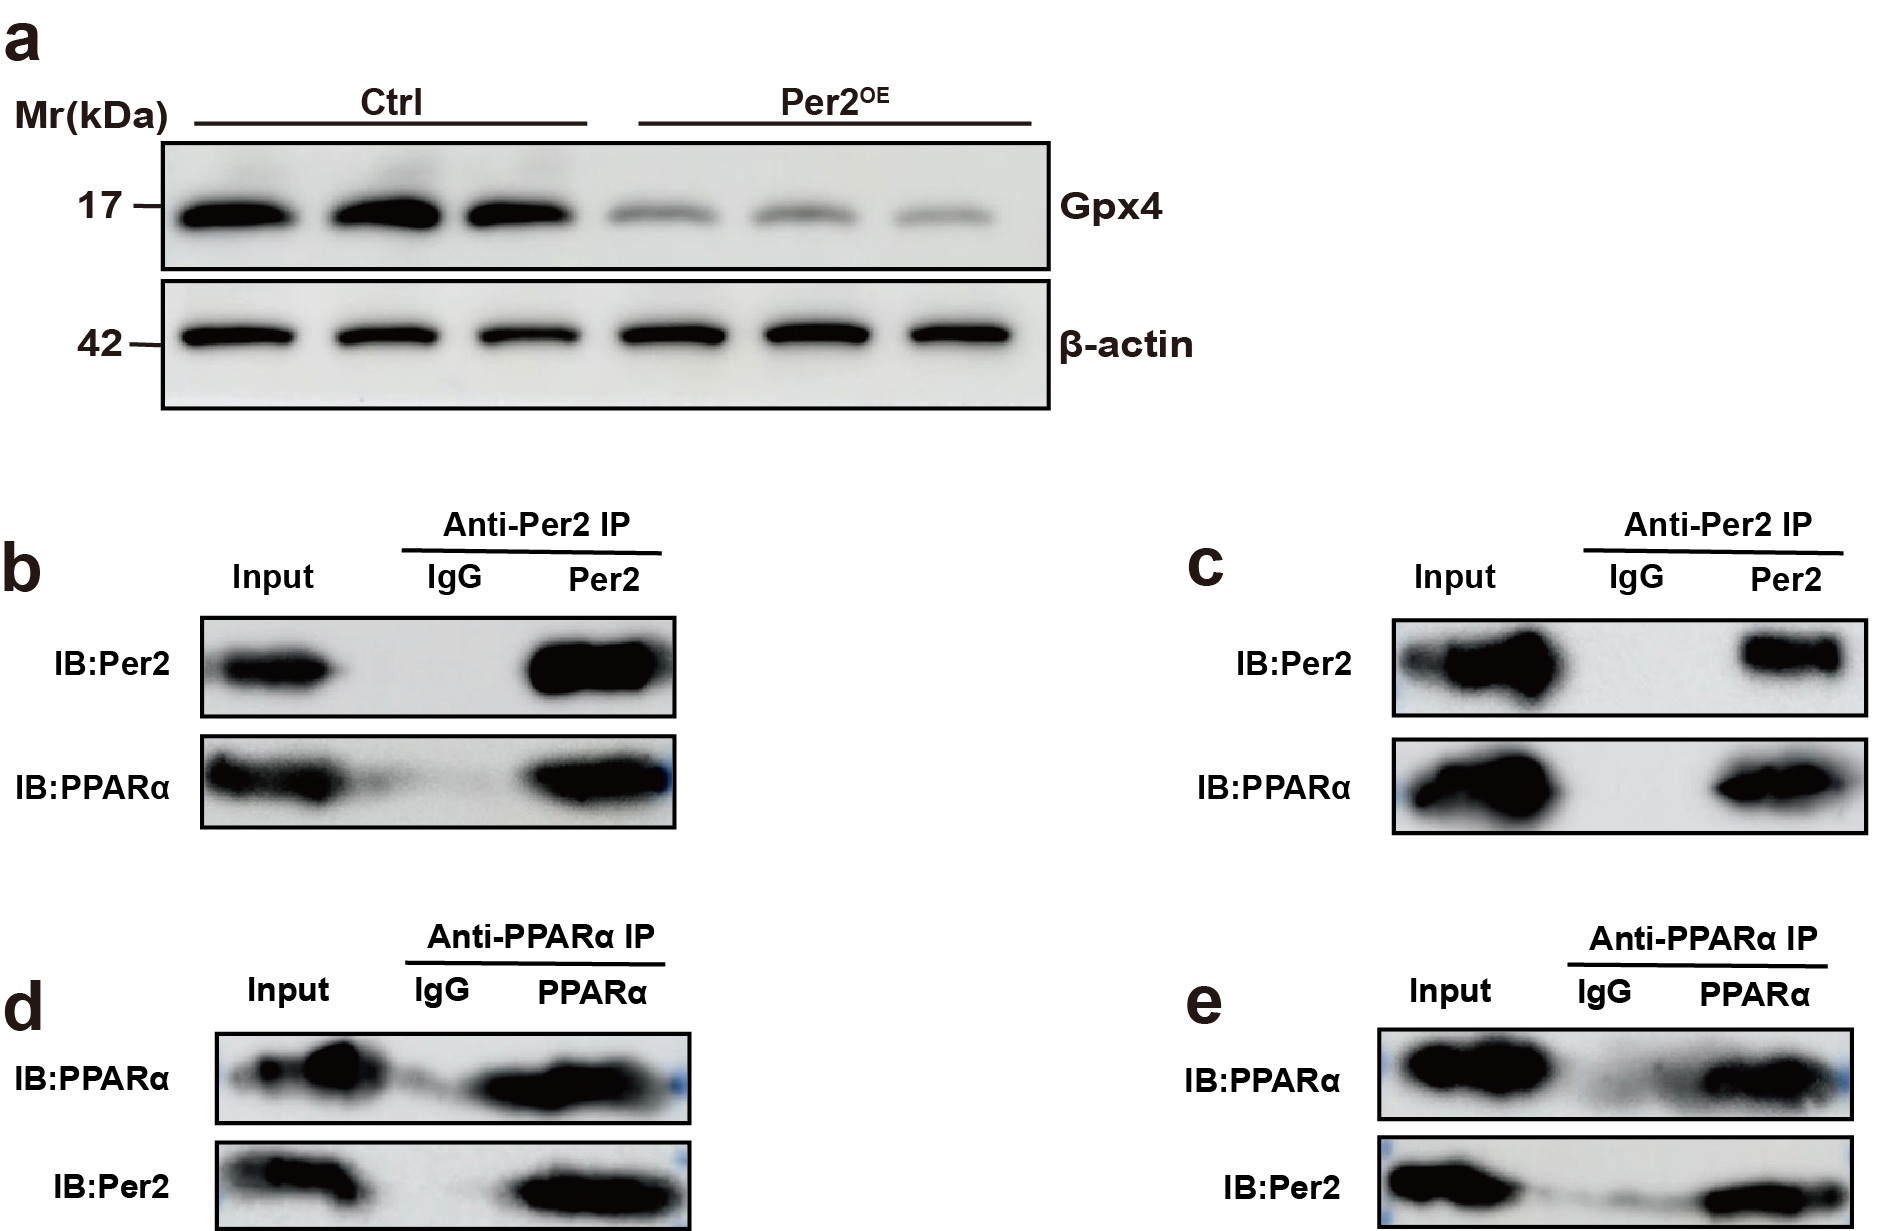


**Supplementary Figure 6** **The Repeated immunoblots.** **a** Repeated immunoblots of Fig. 6d. **b, c** Repeated immunoblots of Fig. 7a. **d, e** Repeated immunoblots of Fig. 7b.

**Table1. The primer used in this article.**

| Gene primers | Forward (5’-3’) | Reverse (5’-3’) |
| --- | --- | --- |
| Acsl4 | CTCACCATTATATTGCTGCCTGT | TCTCTTTGCCATAGCGTTTTTCT |
| Per2 | CACACTTGCCTCCGAAATAACTC | AGCGCACGGCTGTCTGA |
| Gpx4 | GCCTGGATAAGTACAGGGGTT | CATGCAGATCGACTAGCTGAG |
| Ptgs2 | TGAGCAACTATTCCAAACCAGC | GCACGTAGTCTTCGATCACTATC |
| β-actin | AGCCATGTACGTAGCCATCC | GCTGTGGTGGTGAAGCTGTA |
