# Supplementary material for: Per2 deficiency in microglia alleviates motor dysfunction by inhibiting ferroptosis in spinal cord injury
Source: Research Square preprint supplement (doi:10.21203/rs.3.rs-5993581/v1), 2025-02-13

Uncropped gels for Western Blots in Figure 2


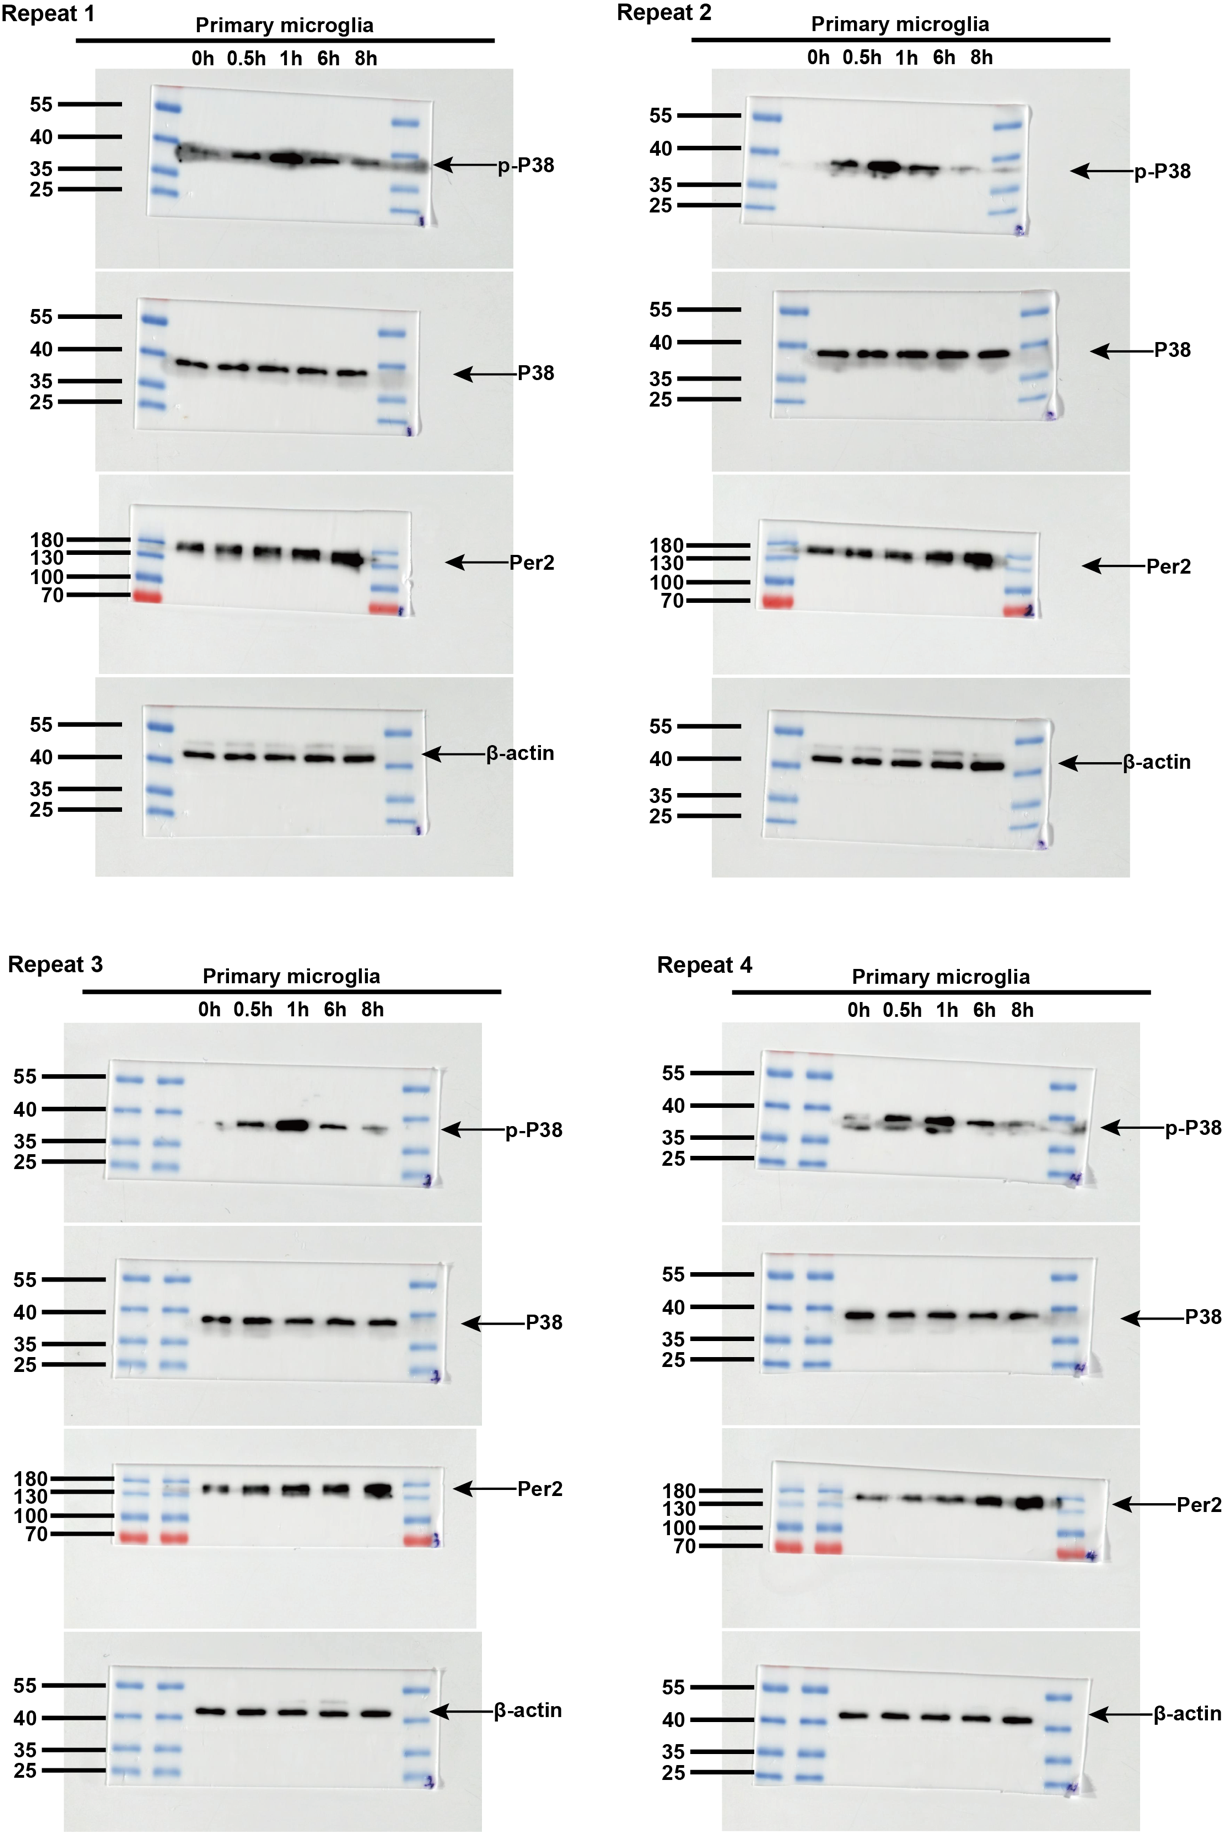

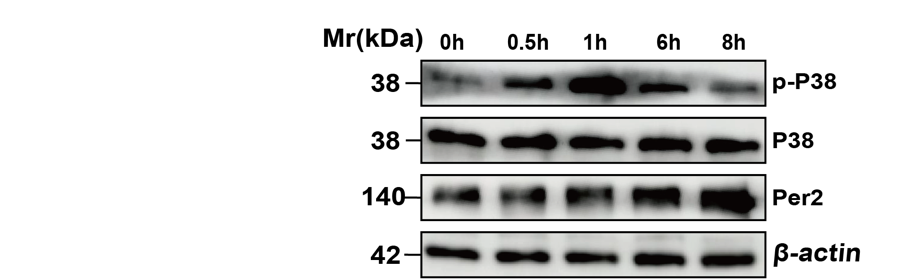
Fig. 2D

Fig. 2G


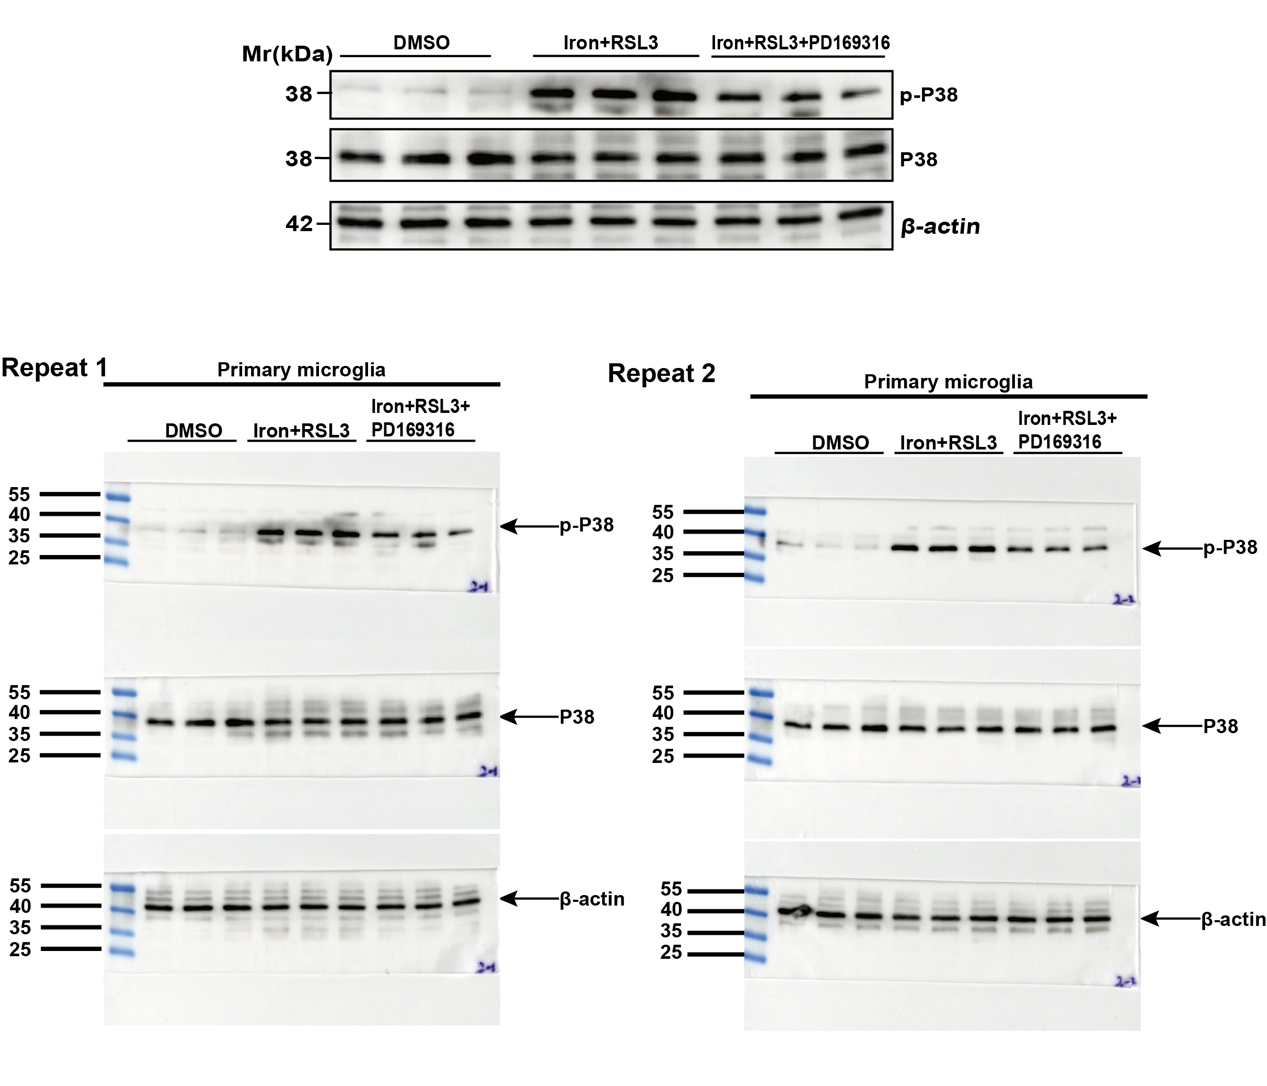


Fig. 2I


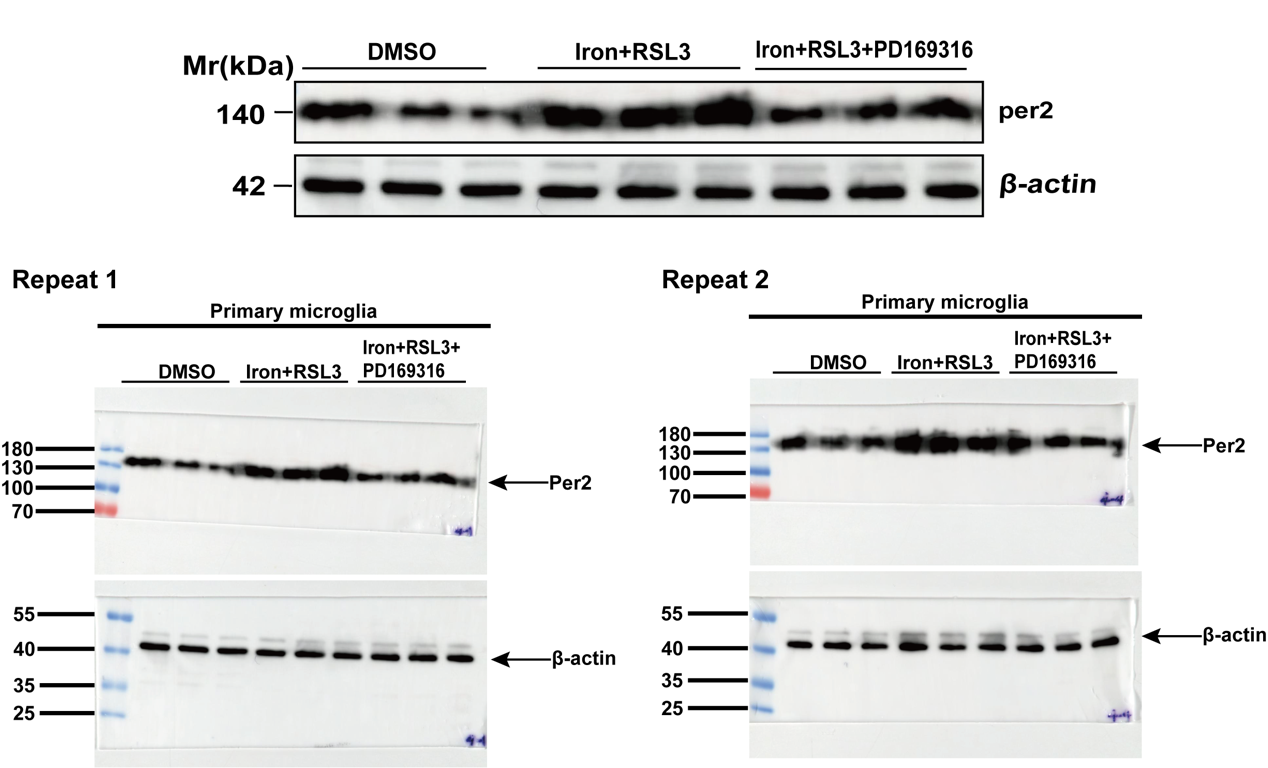


Uncropped gels for Western Blots in Figure 5

Fig. 5A


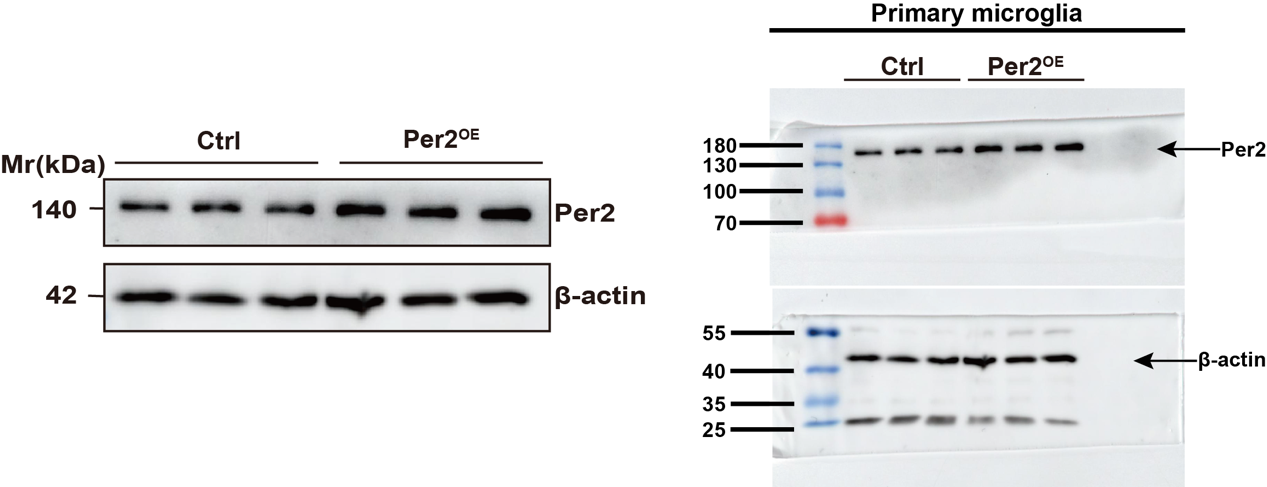


Uncropped gels for Western Blots in Figure 6

Fig. 6D


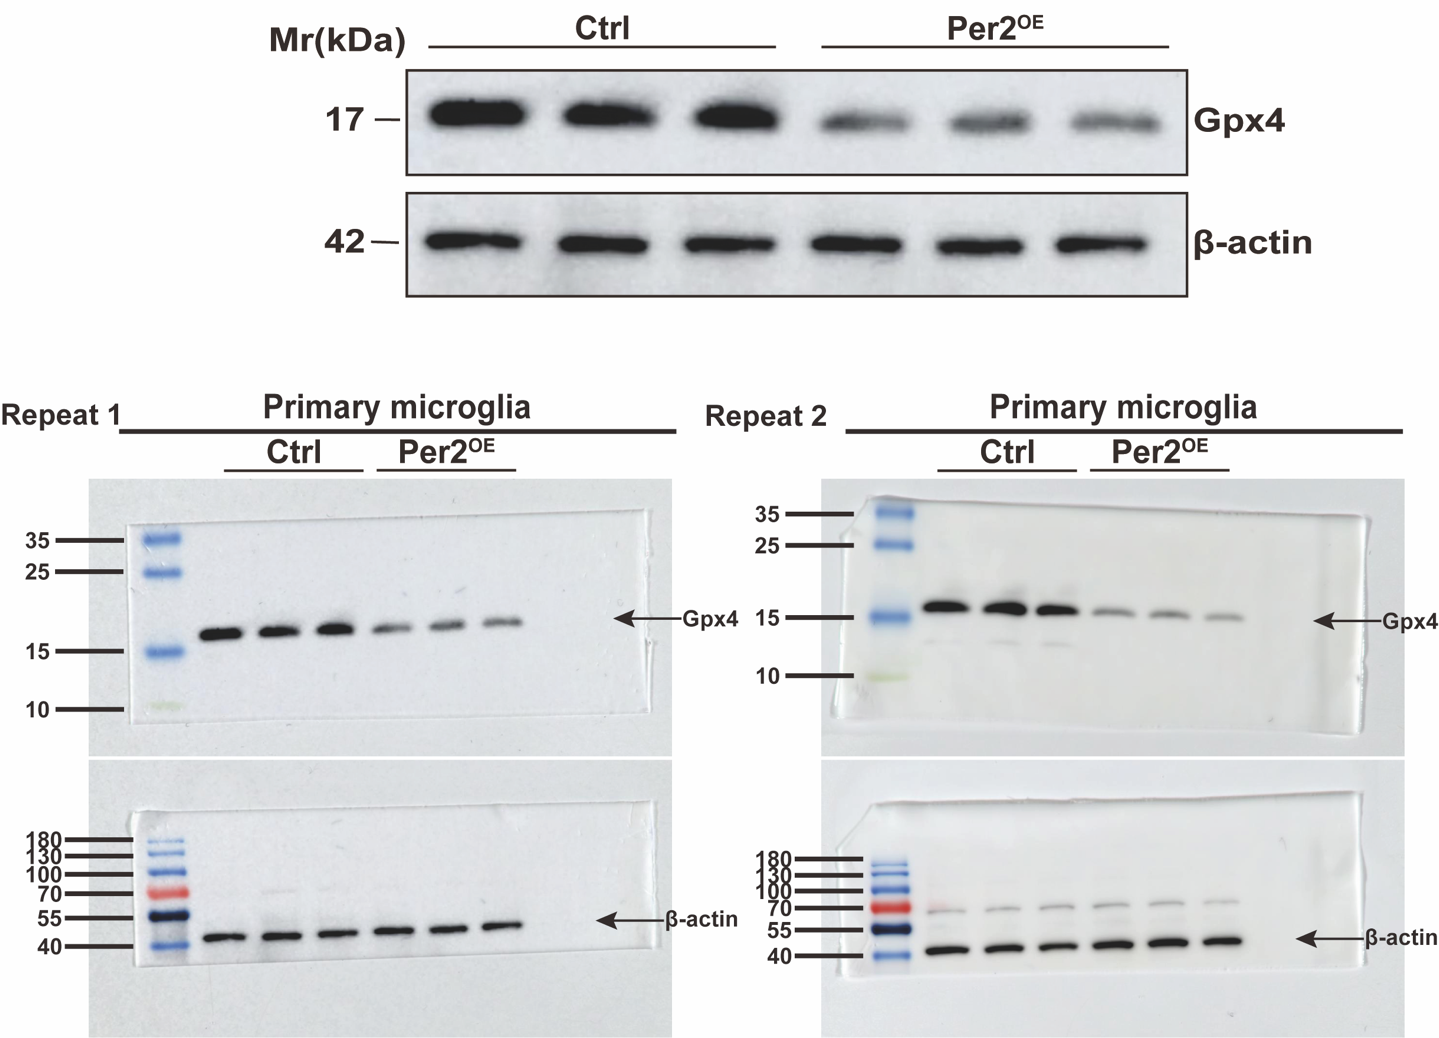


Uncropped gels for Western Blots in Figure 7

Fig. 7A


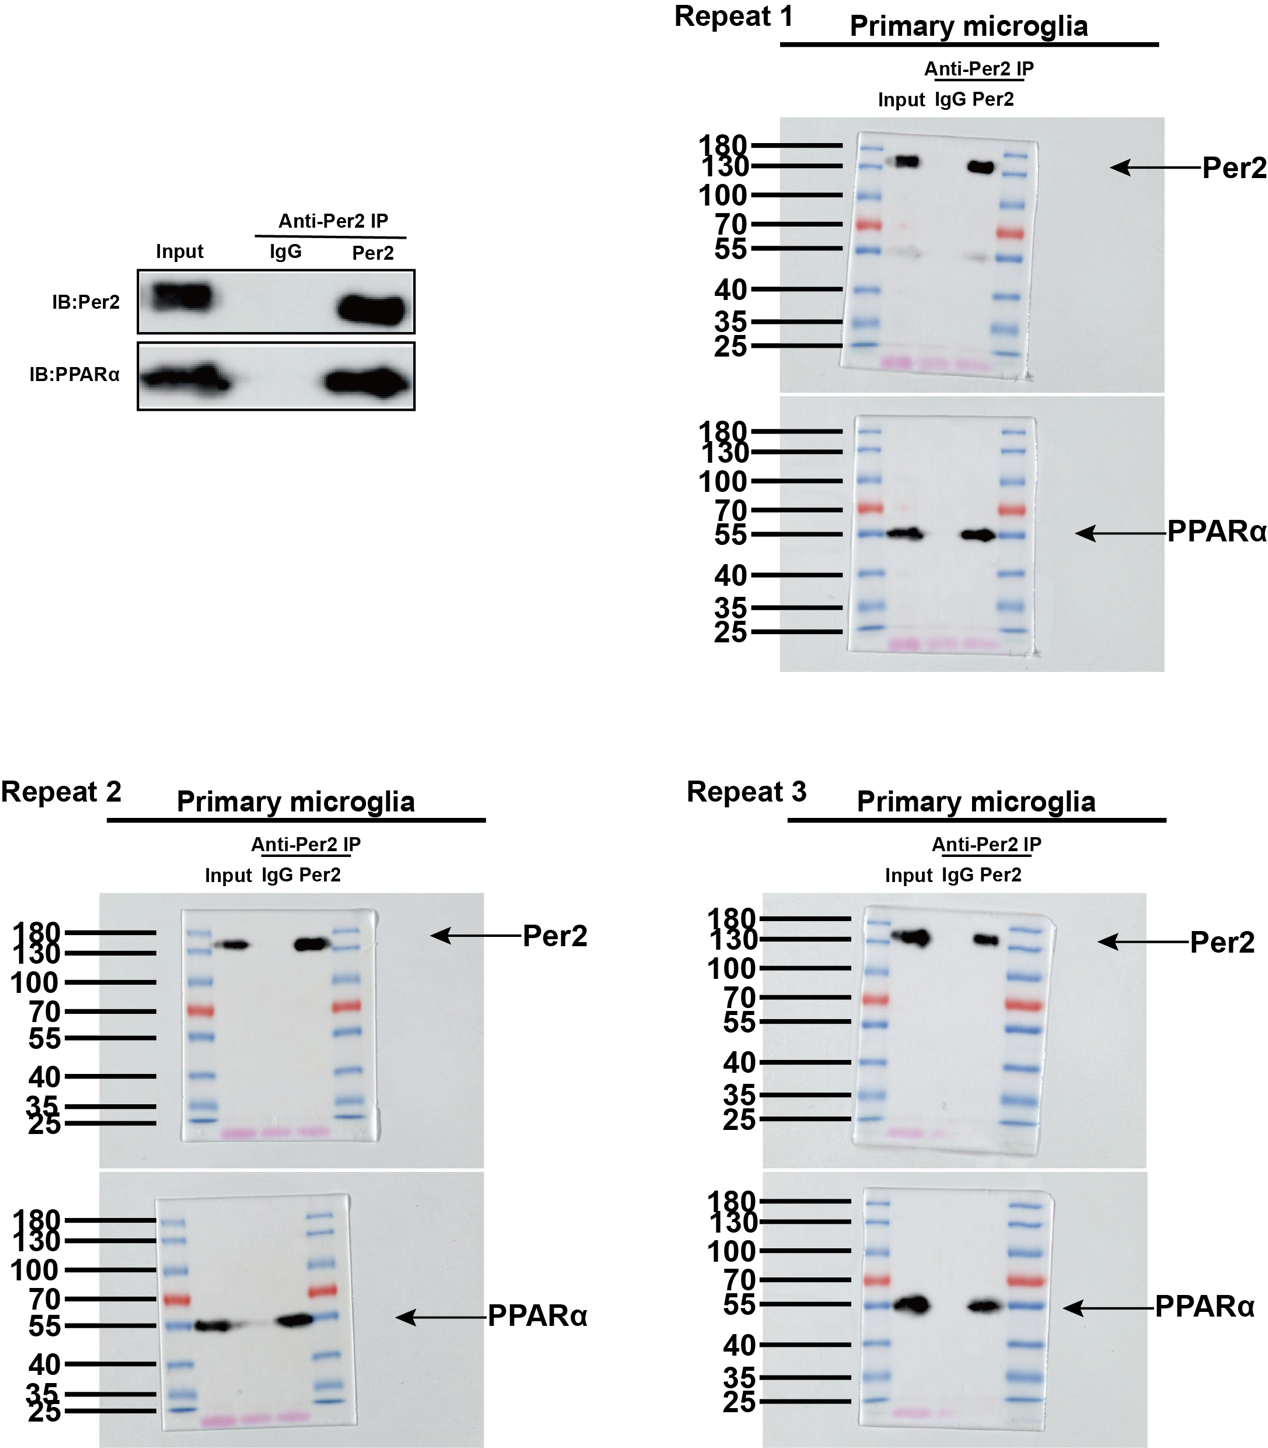


Fig. 7B


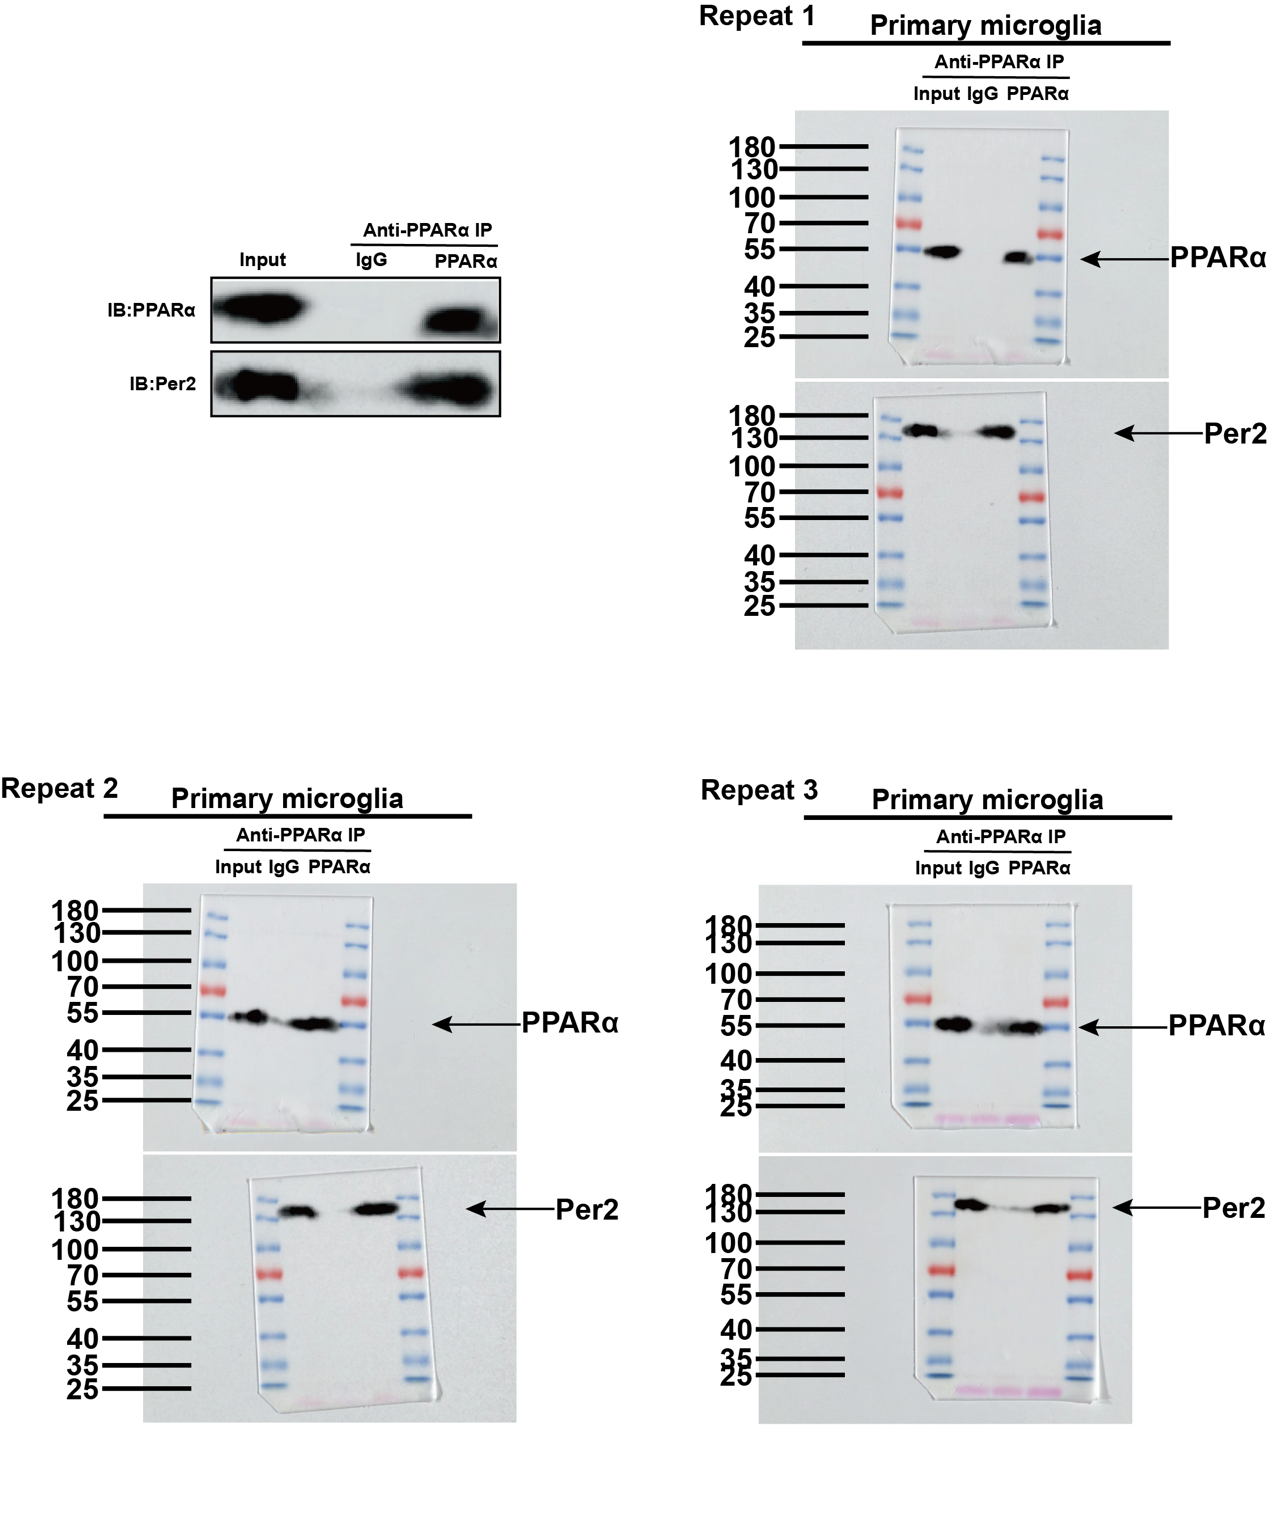


Fig. 7C


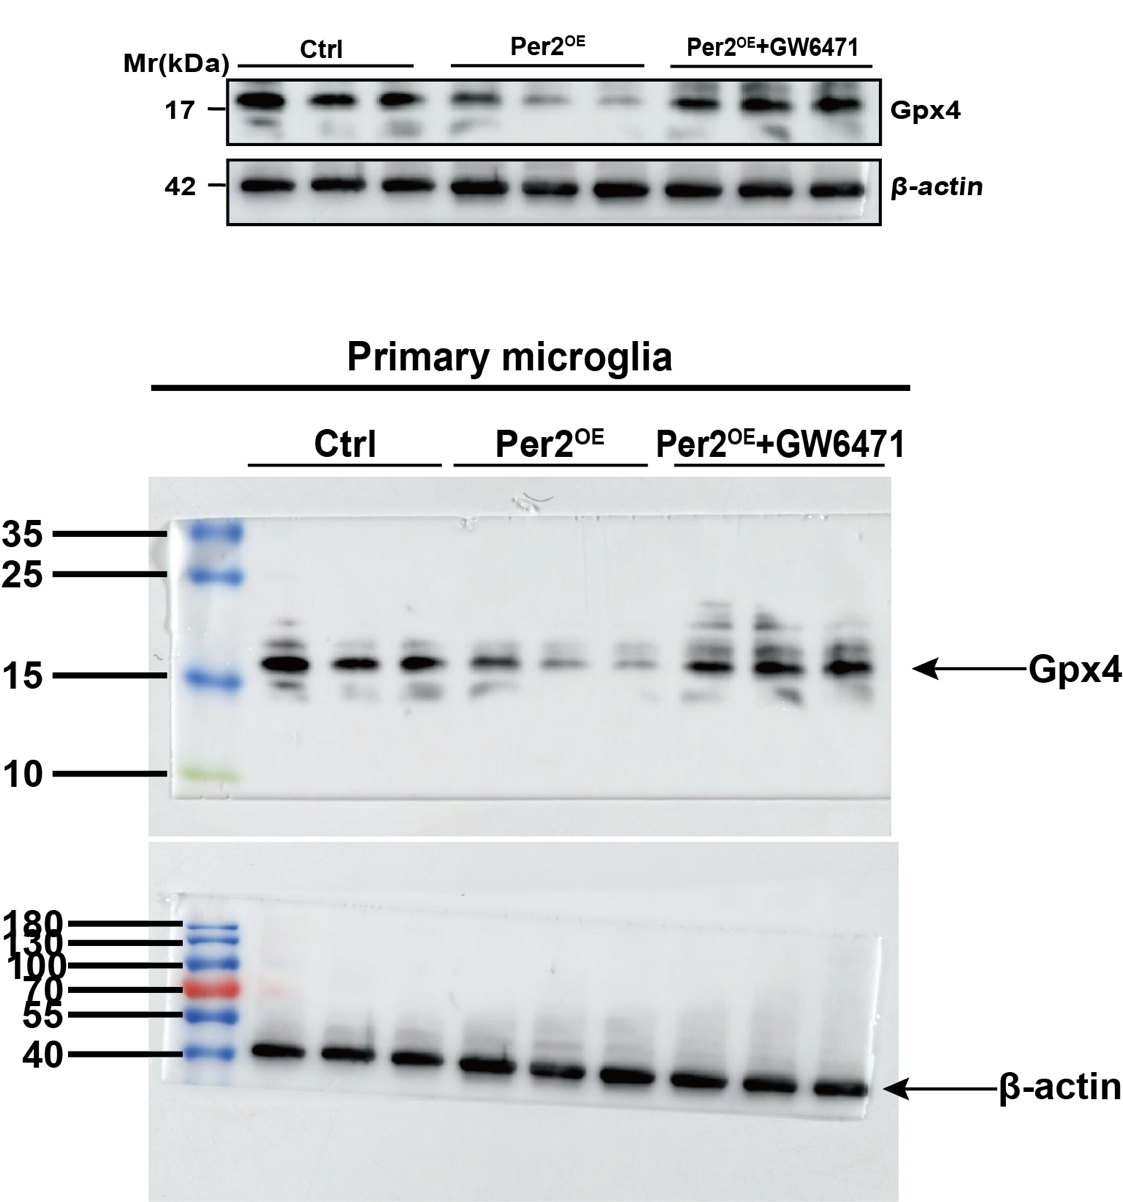

Supplement: Supplementary file 2 [file ca886b0588d483c8397d8103.docx]
